# Supplementary material for: A dual-specific macrophage colony-stimulating factor antagonist of c-FMS and αvβ3 integrin for osteoporosis therapy
Source: PLoS Biol. 2018 Aug 24;16(8):e2002979. doi: 10.1371/journal.pbio.2002979 (PMC6126843; doi:10.1371/journal.pbio.2002979)
Supplement: S1 Table — M-CSF, macrophage colony-stimulating factor; SPR, surface plasmon resonance. (XLSX) [file pbio.2002979.s018.xlsx]

## Sheet: S1 Table
M-CSF variants SPR affinities
Variant	Literature values for KD to	KD to c-FMS [nM]	KD to αvβ3 integrin [nM]
	c-FMS [nM]
M-CSFWT	13.6	†	†
4.22	†	152 ± 12.1	199 ± 17.4
4.24	†	219 ± 28.2	108 ± 7.5
5.6	†	96 ± 4.7	245 ± 12.5
M-CSFαvβ3	†	**	231 ± 3.8
M-CSFc-FMS	†	195 ± 0.15	**
