# Supplementary material for: A dual-specific macrophage colony-stimulating factor antagonist of c-FMS and αvβ3 integrin for osteoporosis therapy
Source: PLoS Biol. 2018 Aug 24;16(8):e2002979. doi: 10.1371/journal.pbio.2002979 (PMC6126843; doi:10.1371/journal.pbio.2002979)
Supplement: S2 Data — (XLSX) [file pbio.2002979.s020.xlsx]

## Sheet: A
FACS based binding of 4.22 and 5.6 to MDA-231
	Cells only	1uM	2.5uM	7.5uM
4.22 - 488 binding intensitiy	2889	13100	12909	55441
		11978	19438	48471
		10856	15977	50718
	Cells only	1uM	2.5uM	7.5uM
5.6 - 488 binding intensitiy	2889	12337	27968	49315
		17012	27884	72344
		12889	19649	54057

## Sheet: B
FACS based binding of 4.22 and 5.6 to pre osteoclasts
4.22 - 488 binding intensitiy	cells only	1uM	2.5uM	7.5uM
	6343	12175	23876	51489
		15657	17726	57941
		13536	26828	65377
5.6 - 488 binding intensitiy	cells only	1uM	2.5uM	7.5uM
	6343	11316	15507	52125
		16084	18007	47203
		11206	19421	43444

## Sheet: C
FACS based binding competition assay
	Cells only	5.6 1uM	5.6 1uM + M-CSF WT 5uM	5.6 1uM + cRGD 10uM	5.6 1uM + M-CSF WT 5uM + cRGD 10uM	M-CSF avb3	M-CSF c-FMS
Binding intensity	3124	24764	12841	9777	2926	16568	15119
		22032	13283	8887	2662	15541	17151
		21996	11767	10219	2873	13537	14469
Normalized binding		0.994711	0.560014	0.42638	0.127642	0.678627	0.74893
		0.852448	0.579309	0.387583	0.116113	0.591118	0.631816
		1.15284	0.513171	0.445683	0.125309	0.723472	0.660199

## Sheet: E
c-FMS phosphorylation quantification
All intensities are normalized by the area of measurment using ImageJ
	phospho 1	phospho 2	phospho 3	phospho 4	phospho 5	phospho 6	expression 1	expression 2	expression 3	expression 4	expression 5	expression 6	actin 1	actin 2	actin 3	actin 4	actin 5	actin 6	1	2	3	4	5	6	Average
positive	5449.3	5956.71	4702.2				7076.53	9785.24	6153.8				10551.8	15187.3	12427.9				7.2978e-05	4.00824e-05	6.14836e-05				5.81813e-05
negative	1056.06	1125.74	1188.95				8029.53	7101.46	12978.8				14599	17040.8	10381.4				9.00901e-06	9.30254e-06	8.82413e-06
4.22	3309.62	4992.23	7265.47				13129.2	11809.7	9196.73				14884	18514	18358.6				1.69364e-05	2.28326e-05	4.30319e-05
4.24	17470.9	13666.1	10928.3	18693.6	15641.6	14414.9	6905.61	9664.29	6272.49	6003.49	8361.17	7230.29	46276	44930.2	44910.5	91230.2	70057.2	70527.4	5.4671e-05	3.14729e-05	3.8794e-05	3.41312e-05	2.6703e-05	2.82682e-05
5.6	14122.9	22898.5	14291.5				12996.9	11664.1	11059				61395.4	57511.4	58885.1				1.7699e-05	3.41352e-05	2.1946e-05
RDG	11792.2	8750.71	11091.3				21515	19552.8	19893.3				29207.8	20115.1	20689.8				1.87653e-05	2.2249e-05	2.69475e-05
	Normalized
	1	2	3	4	5	6				pcfms	cfms	actin		norm	Sample
positive	1.25432	0.688921	1.05676						pos	5960.18	3356.89	4592.72	0.000386591	1	1
negative	0.154844	0.159889	0.151666						neg	354.071	3052.77	3553.6	3.26383e-05	0.084426	1
4.22	0.291097	0.392438	0.739617						4.22	3322.74	3182.79	3846.72	0.000271393	0.702014	3
4.24	0.939665	0.540944	0.666778	0.586635	0.458961	0.485863			4,24	4013.5	3257.55	4384.79	0.000280985	0.726828	3
5.6	0.304204	0.586704	0.3772						5.6	2981.96	2528.48	4860.03	0.000242663	0.6277	2
M-CSFc-FMS	0.322531	0.382408	0.463163							9526	7310.57	7142.86	0.000182426	0.471884	3

## Sheet: G
Akt phosphorylation quantification
All intensities are normalized by the area of measurment using ImageJ
	phospho 1	phospho 2	phospho 3	expression 1	expression 2	expression 3	actin 1	actin 2	actin 3	pho. Average	exp. Average	act averge	sum	relative	1	2	3
positive	145673	104885	121779	68228.9	56540.9	68982.2	59584	50171.4	71270.8	124113	64584	60342.1	3.18472e-05	1	1.12515	1.16098	0.777775
negative	101959	105790	94158.7	71720.4	77151.6	74661.6	129728	140325	125819	100636	74511.2	131957	1.02352e-05	0.321386	0.344095	0.306827	0.314736
4.22	10390.9	20145.8	38513.7	146764	73733.1	73733.1	17818.1	39667.2	36803.4	23016.8	98076.8	31429.6	7.46689e-06	0.23446	0.124767	0.216282	0.445649
4.24	32820.8	83075.9	98171.6	188723	143027	123552	93454.7	122671	122511	71356.1	151768	112879	4.16523e-06	0.130788	0.058432	0.148677	0.203652
5.6	42914.2	72678.2	39498.4	251877	323285	114762	135479	135854	147362	51696.9	229975	139565	1.61068e-06	0.0505751	0.0394883	0.0519607	0.0733372
mono	73912.5	90478.5	31401.8	151238	213593	228910	139632	129541	114643	65264.3	197914	127939	2.57749e-06	0.080933	0.1099	0.102679	0.0375725
RDG	107451	164350	32974.6	151238	213593	228910	110284	165010	140064	101592	197914	138453	3.7075e-06	0.116415	0.202287	0.14642	0.0322935
