# Supplementary material for: A dual-specific macrophage colony-stimulating factor antagonist of c-FMS and αvβ3 integrin for osteoporosis therapy
Source: PLoS Biol. 2018 Aug 24;16(8):e2002979. doi: 10.1371/journal.pbio.2002979 (PMC6126843; doi:10.1371/journal.pbio.2002979)
Supplement: S3 Data — (XLSX) [file pbio.2002979.s021.xlsx]

## Sheet: B
Data of the ratio between actin belts and osteoclasts
	Positive	Negative	4.22	4.24	5.6	M-CSF avb3	M-CSF c-FMS	cRGD
# actin belts per osteoclast	0.6	0	0.1667	0.130435	0.28	0.2	0.666667	0.3333
	0.57	0	0.25	0.12	0.2381	0.3913	0.3	0.47
	0.78	0	0.2609	0.12	0.259	0.296	0.48	0.3333
